# Supplementary material for: The role of periodontitis in the link between alpha-tocopherol intake and cognitive performance: A mediation analysis in older adults
Source: Front Aging Neurosci. 2023 Mar 9;15:1129095. doi: 10.3389/fnagi.2023.1129095 (PMC10034200; doi:10.3389/fnagi.2023.1129095)
Supplement: Supplementary file 1 [file Table_1.DOCX]

Supplementary Material

The role of periodontitis in the link between alpha-tocopherol intake and cognitive performance: a mediation analysis in older adults

Heming Zhang1, 2†, Li Sun1†, Lin Zhang3, Jiangjing Li1, Yongfei Liu1, Zhiyang Chen1,2, Shuang Wang1, Changjun Gao1*, Xude Sun1*

*** Correspondence:** Xude Sun: sunxudes@163.com, Changjun Gao: gaocj74@163.com

# Supplementary Figures


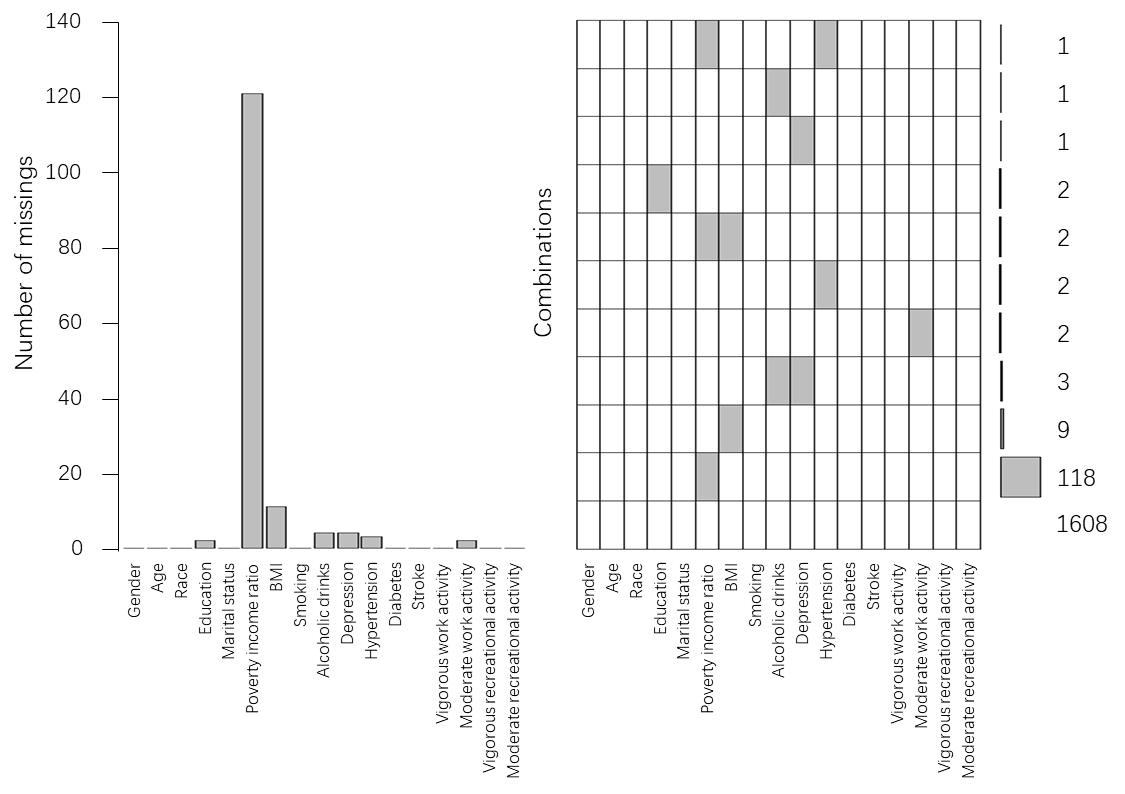


**Supplementary Figure S1.** Missing data of included participants.
